# Supplementary material
Source: publisher figshare collection journal article supplement (https://tandf.figshare.com/ndownloader/files/36013821)
Supplement: Supplementary file 1 [file 36013821]

**Synthesis of Novel Pyridine and Pyrimidine Thioglycoside Phosphoramidates for the Treatment of COVID-19 and Influenza A Viruses**

Mamdouh A. Abu-Zaieda, Galal H. Elgemeieb*, Fathi T. Halaweishc and Sherif F. Hammadd,e

aGreen Chemistry Department, National Research Centre, Dokki, Giza, Egypt; bChemistry Department, Faculty of Science, Helwan University, Helwan, Cairo, Egypt; cDepartment of Chemistry & Biochemistry,South Dakota State University, Brookings, SD 57007, USA; dPharmaceutical Chemistry Department, Faculty of Pharmacy, Helwan University, Helwan, Cairo, Egypt; eBasic and Applied Sciences Institute, Egypt-Japan University of Science and Technology, New Borg El-Arab City, Alexandria, Egypt.

s1


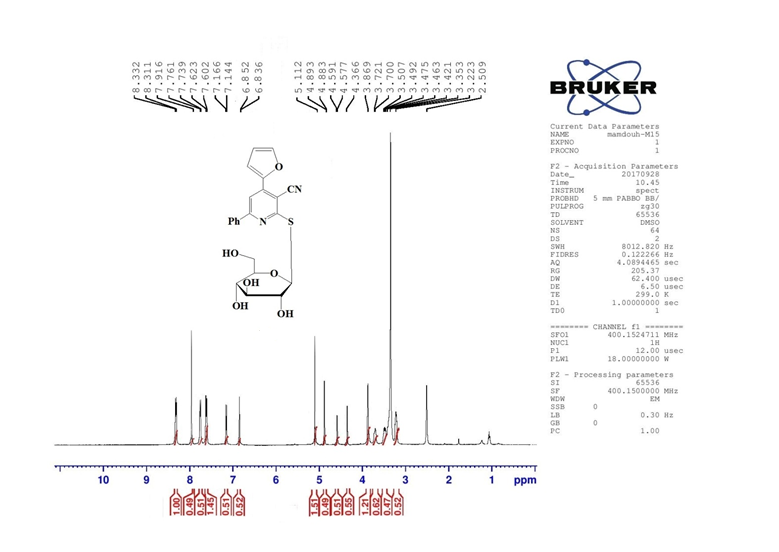


Figure s1: 1H-NMR spectrum of compound **4a**


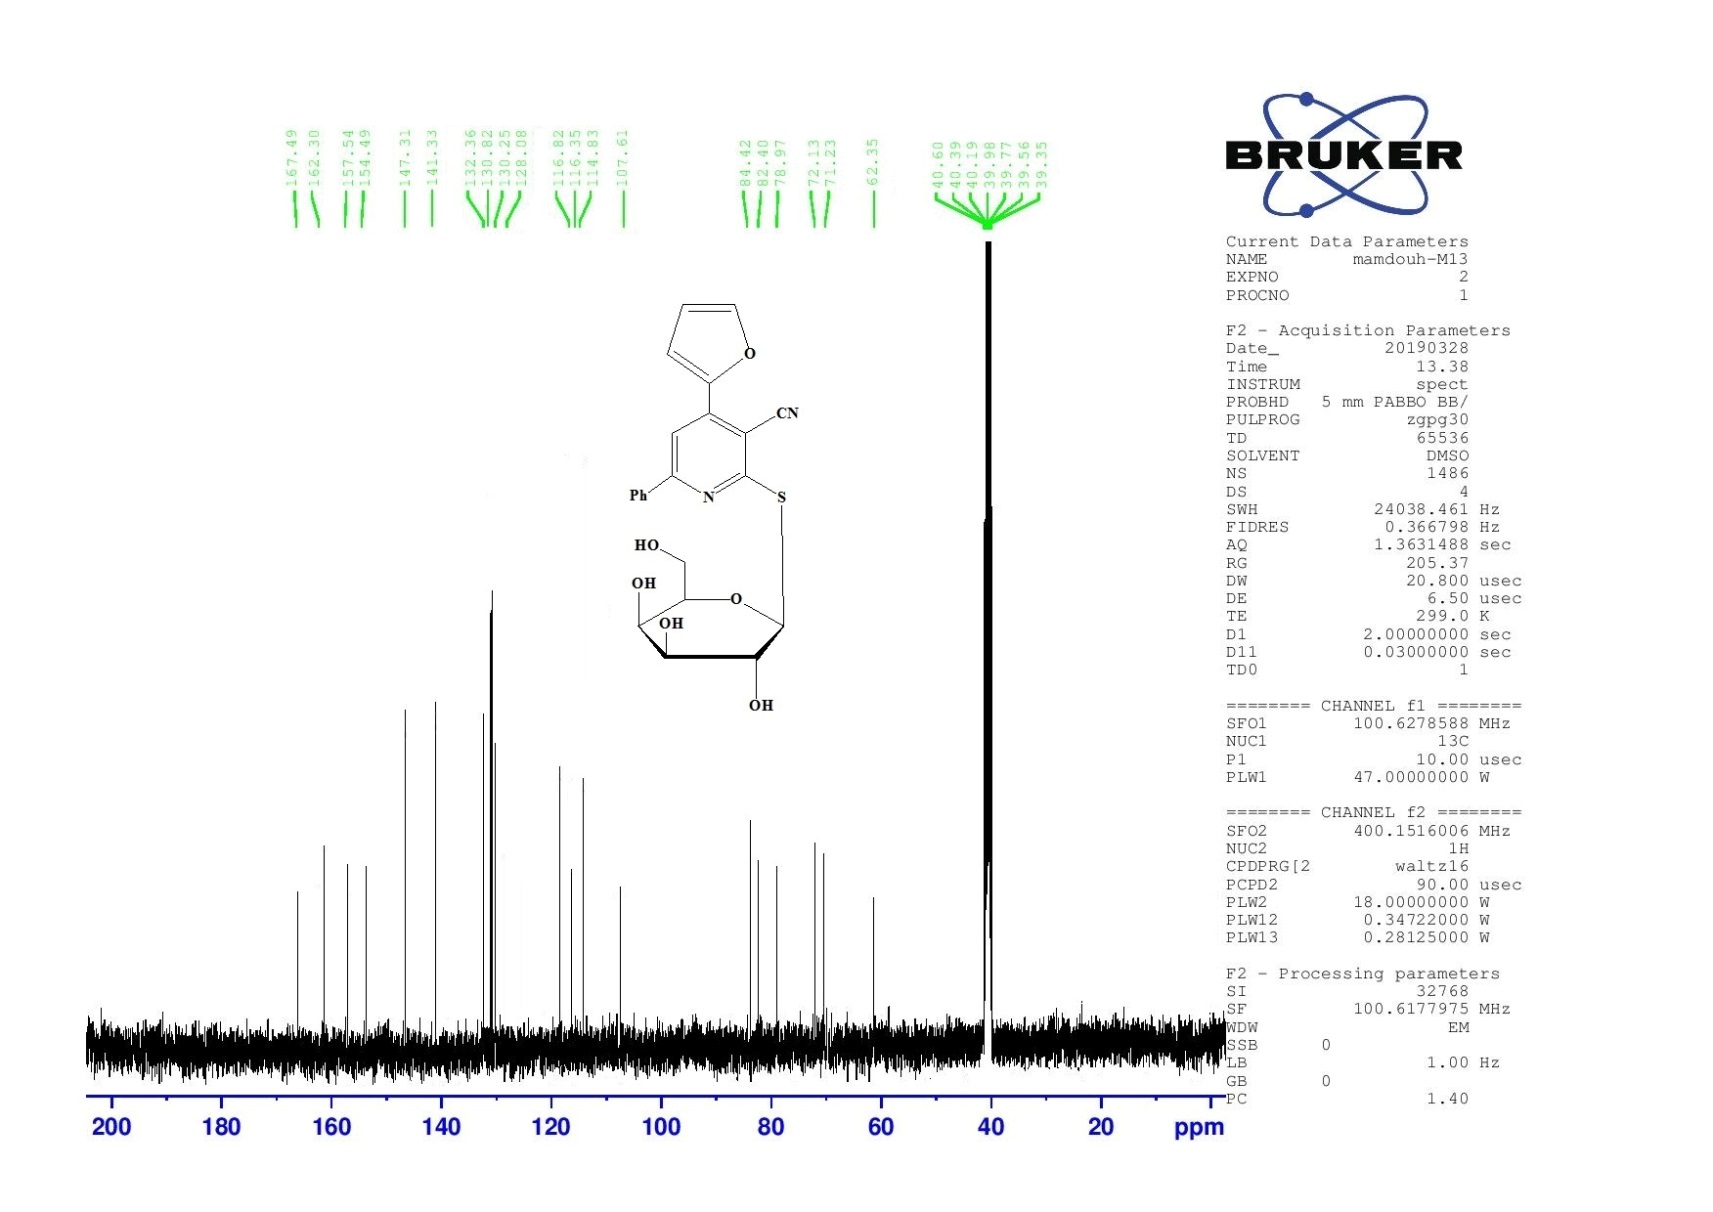
s2

figure s2:13C NMR of compound 4b


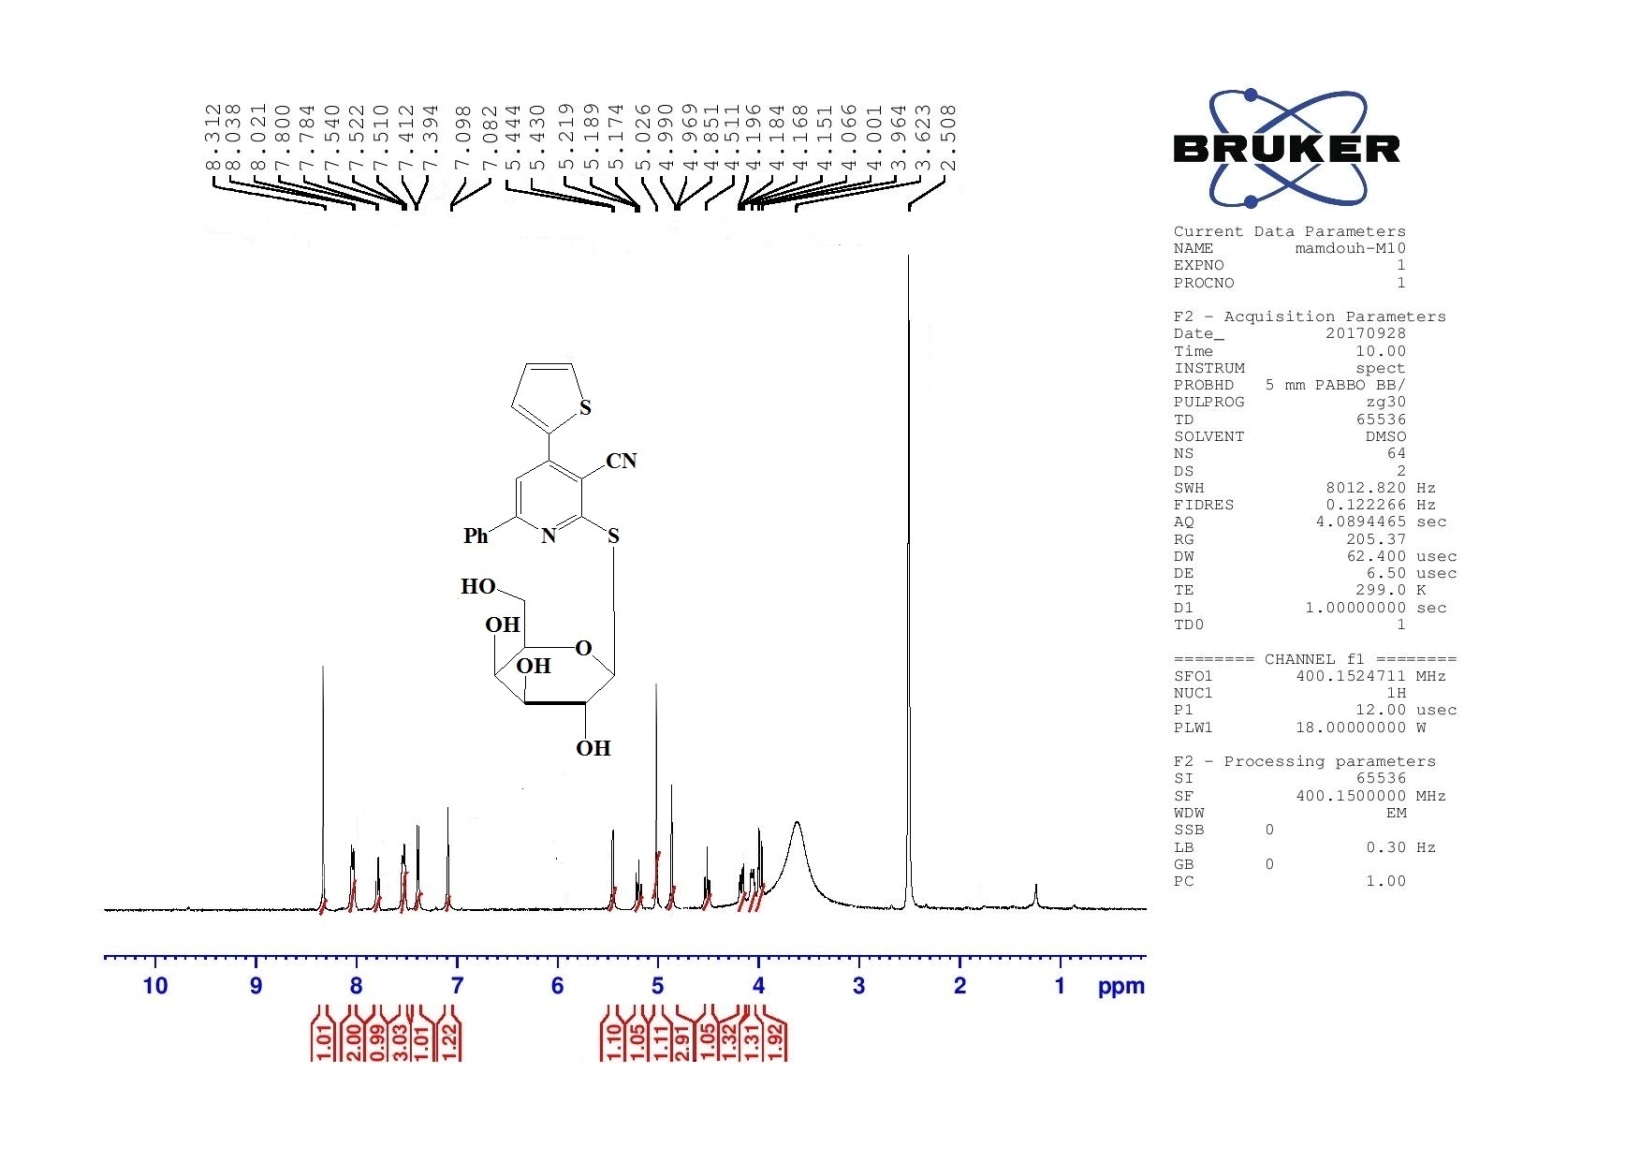
s3

figure s3: 1H NMR of compound 4c

s4


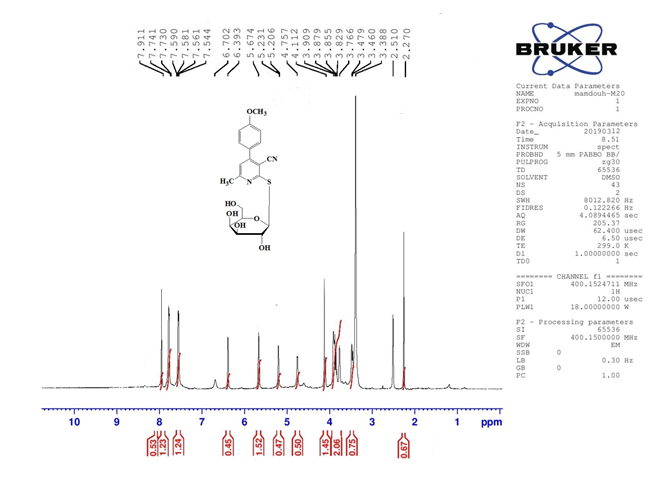


Figure s4: 1H NMR of compound 4e

s5


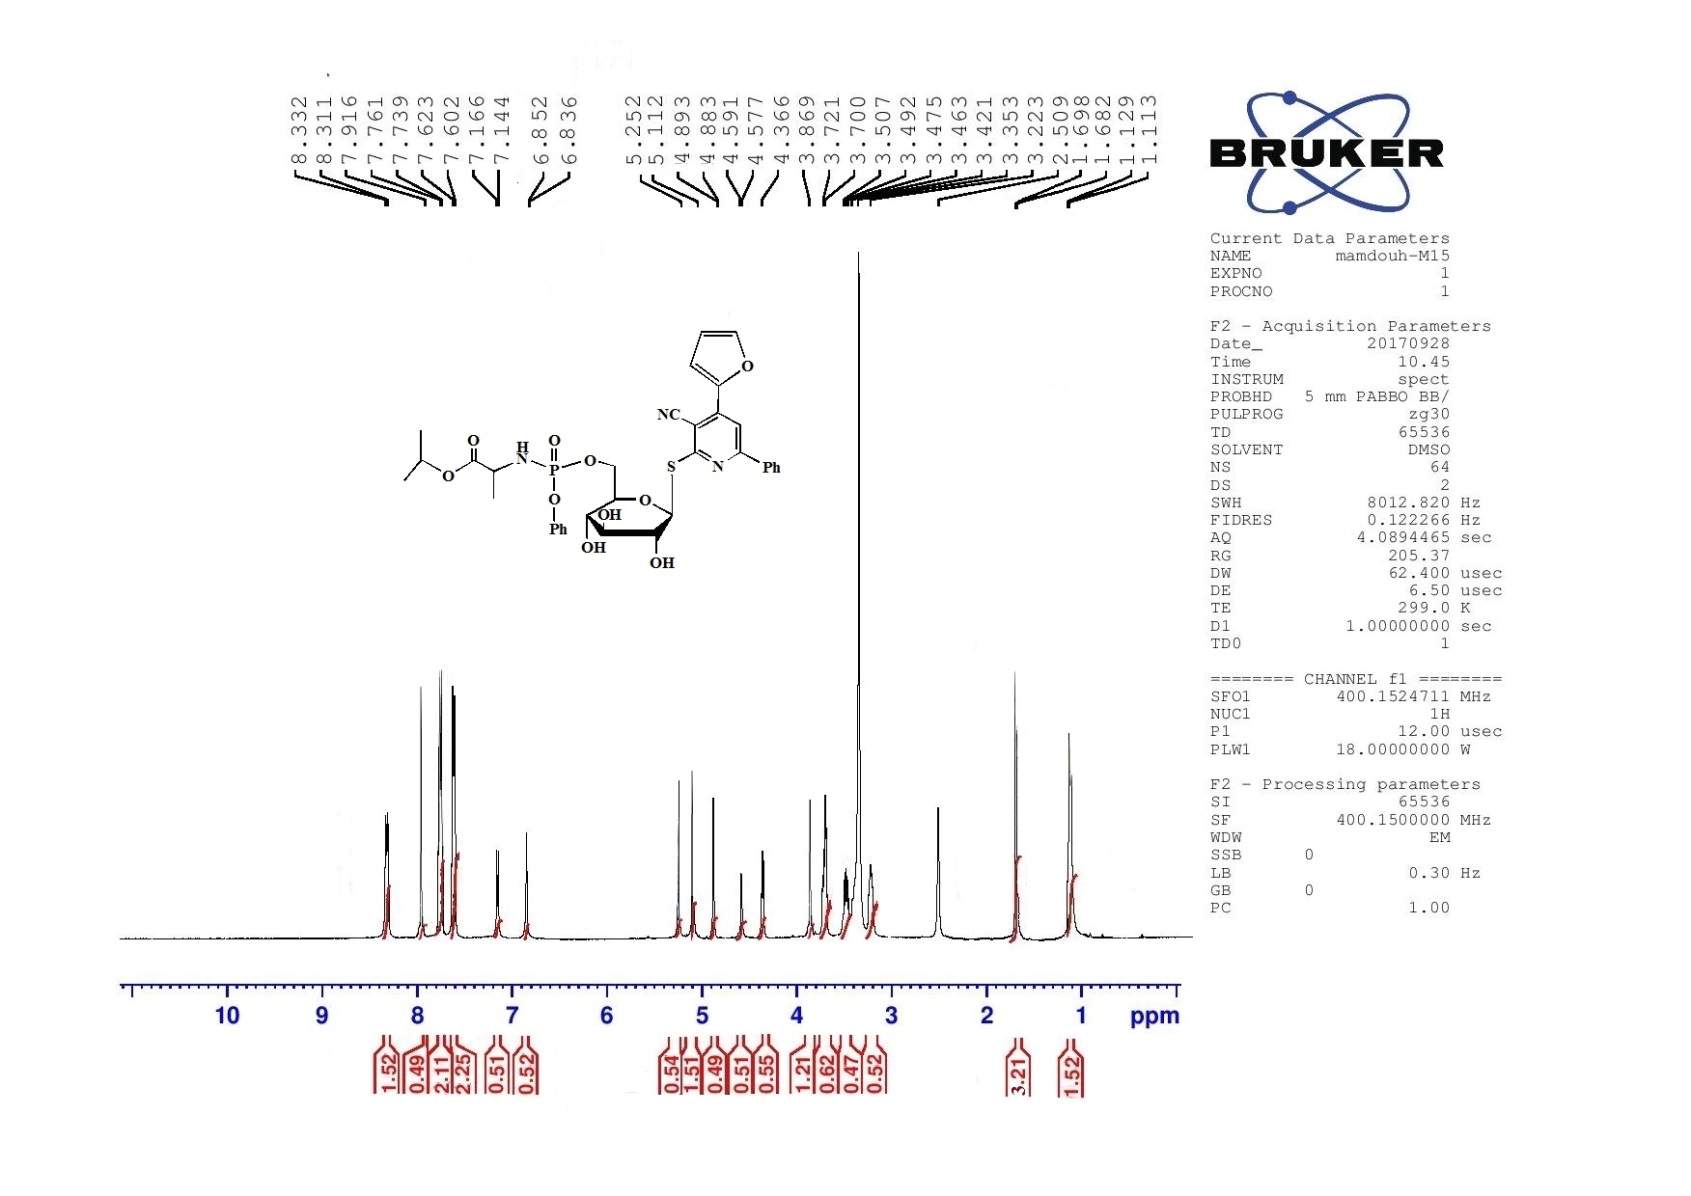
 figure s5: 1HNMR of compound 6a


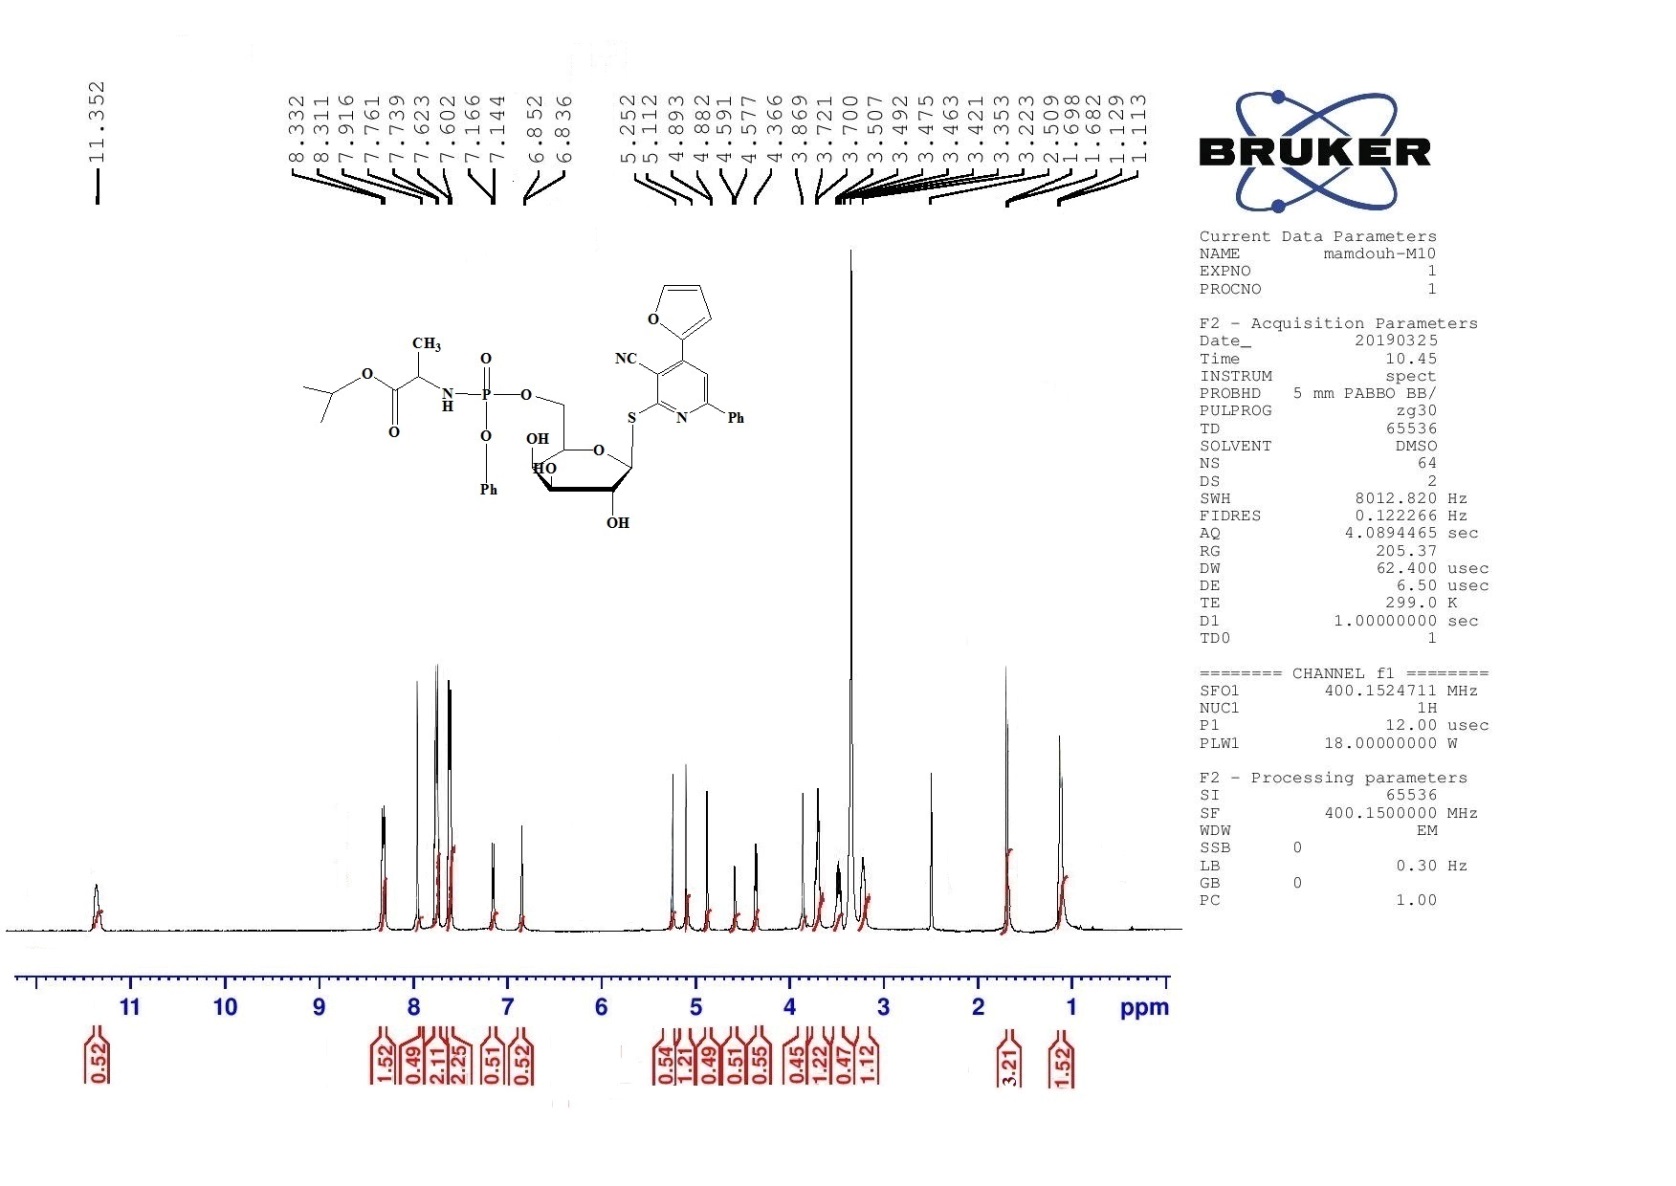
s6

figure s6: 1HNMR of compound 6b

s7


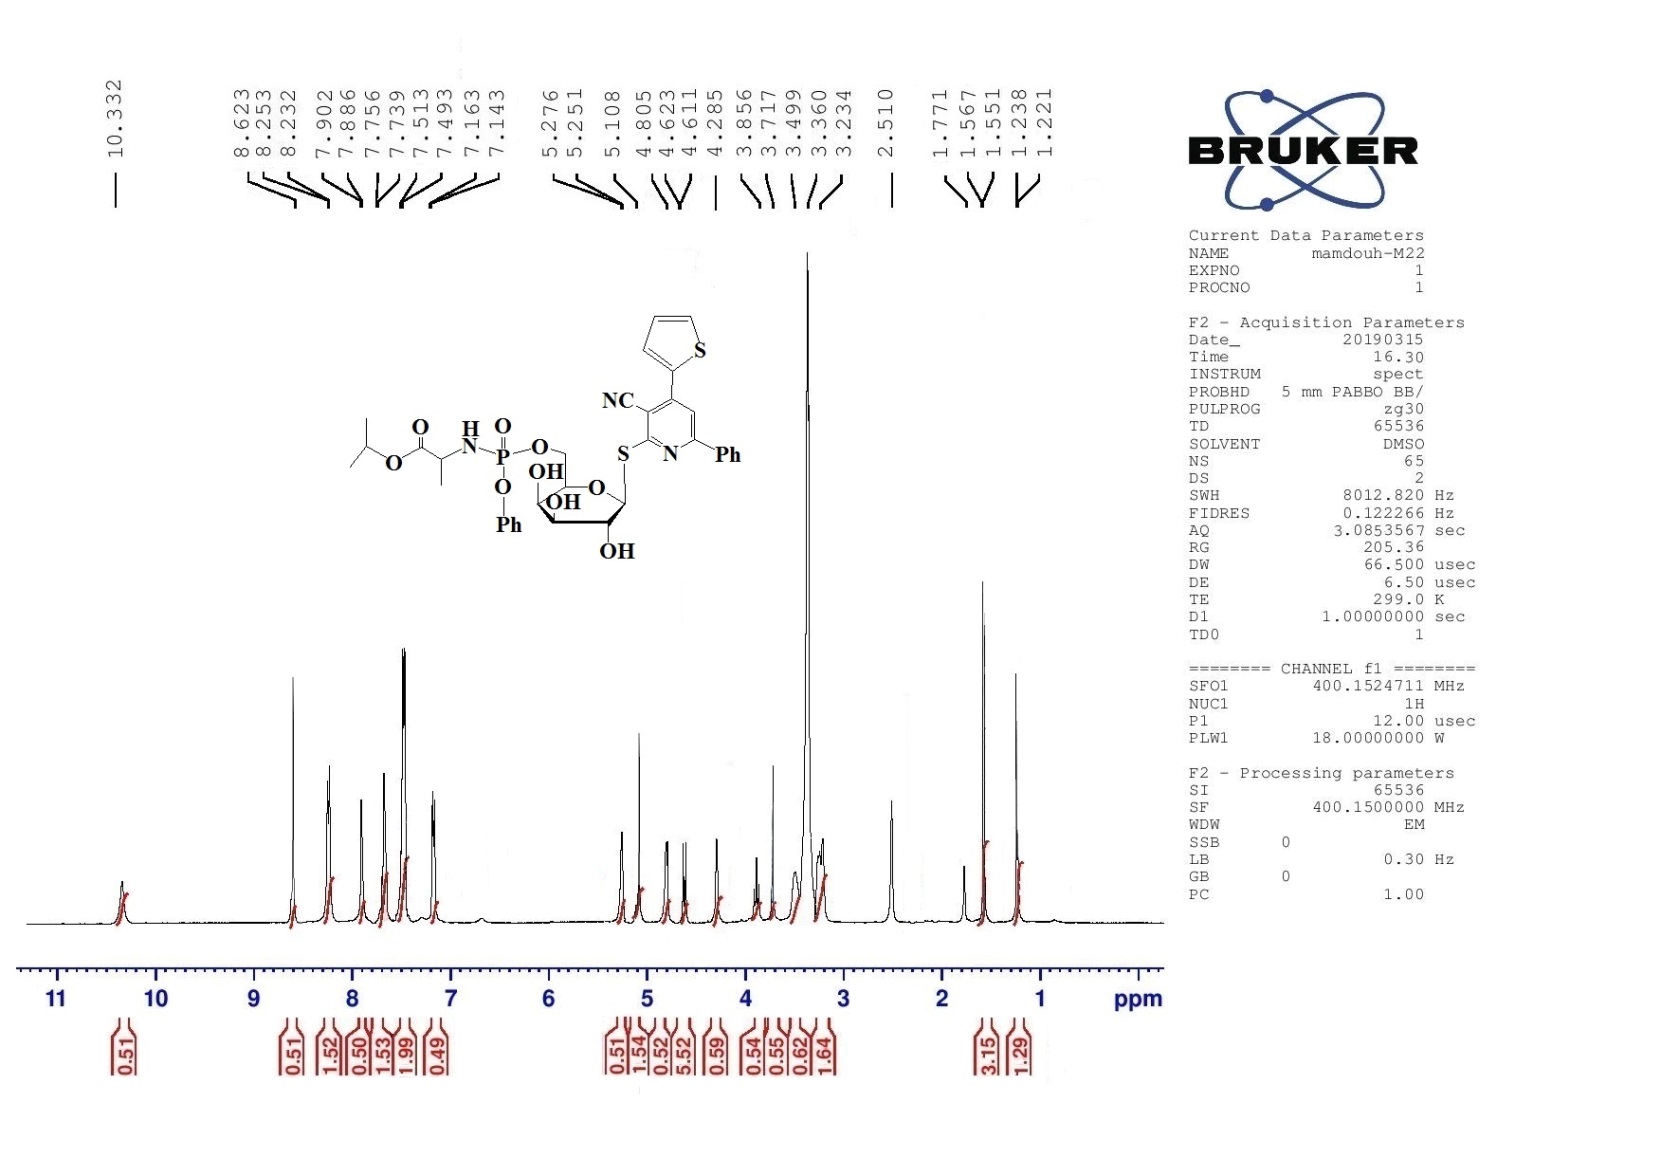
 figure s7: 1HNMR of compound 6c

S8


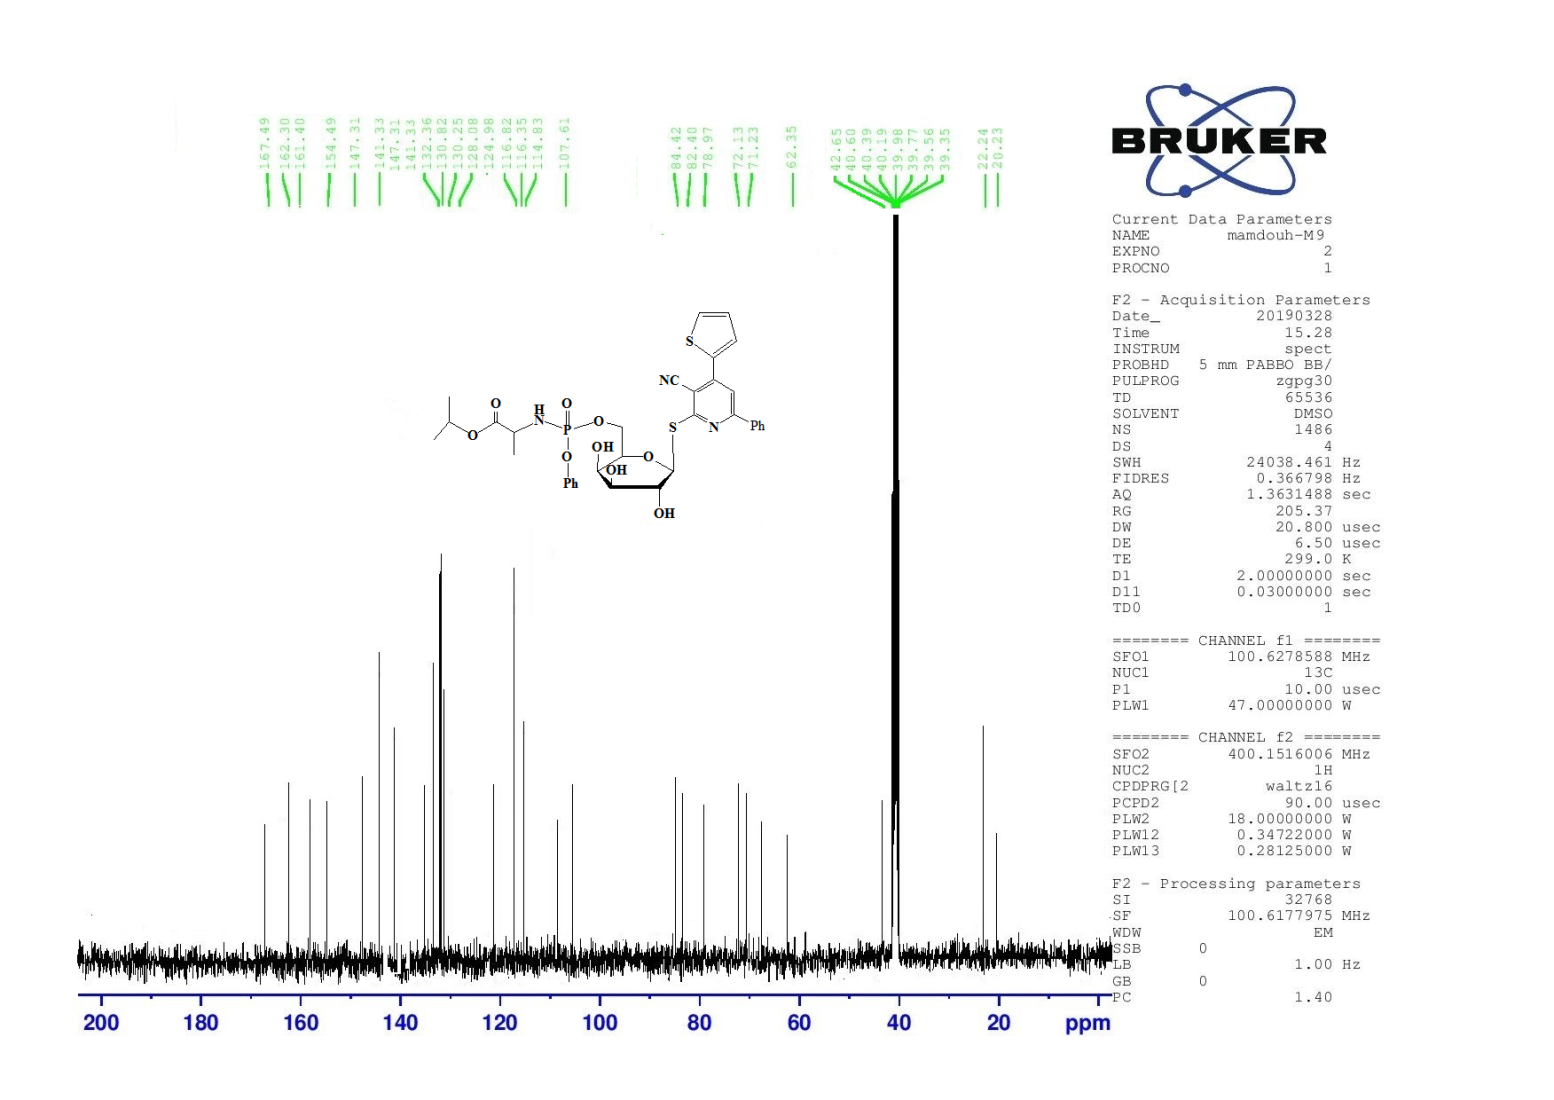


Figure s8: 13C NMR of compound 6c

S9
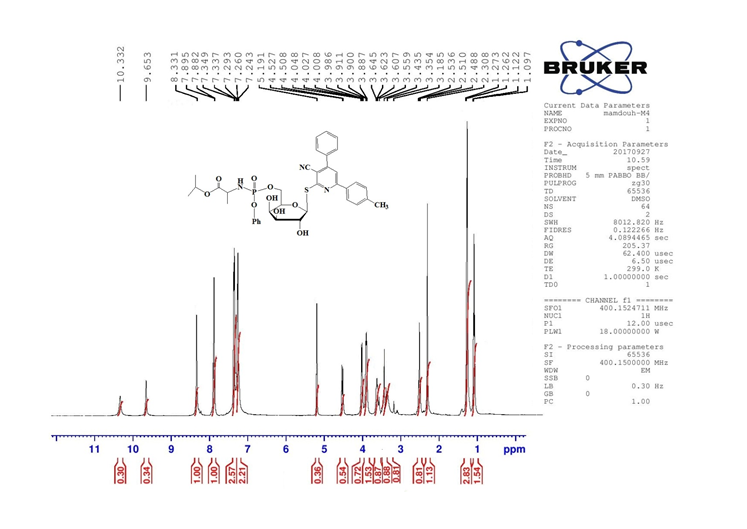
 figure s9: 1H NMR of compound 6d

S10


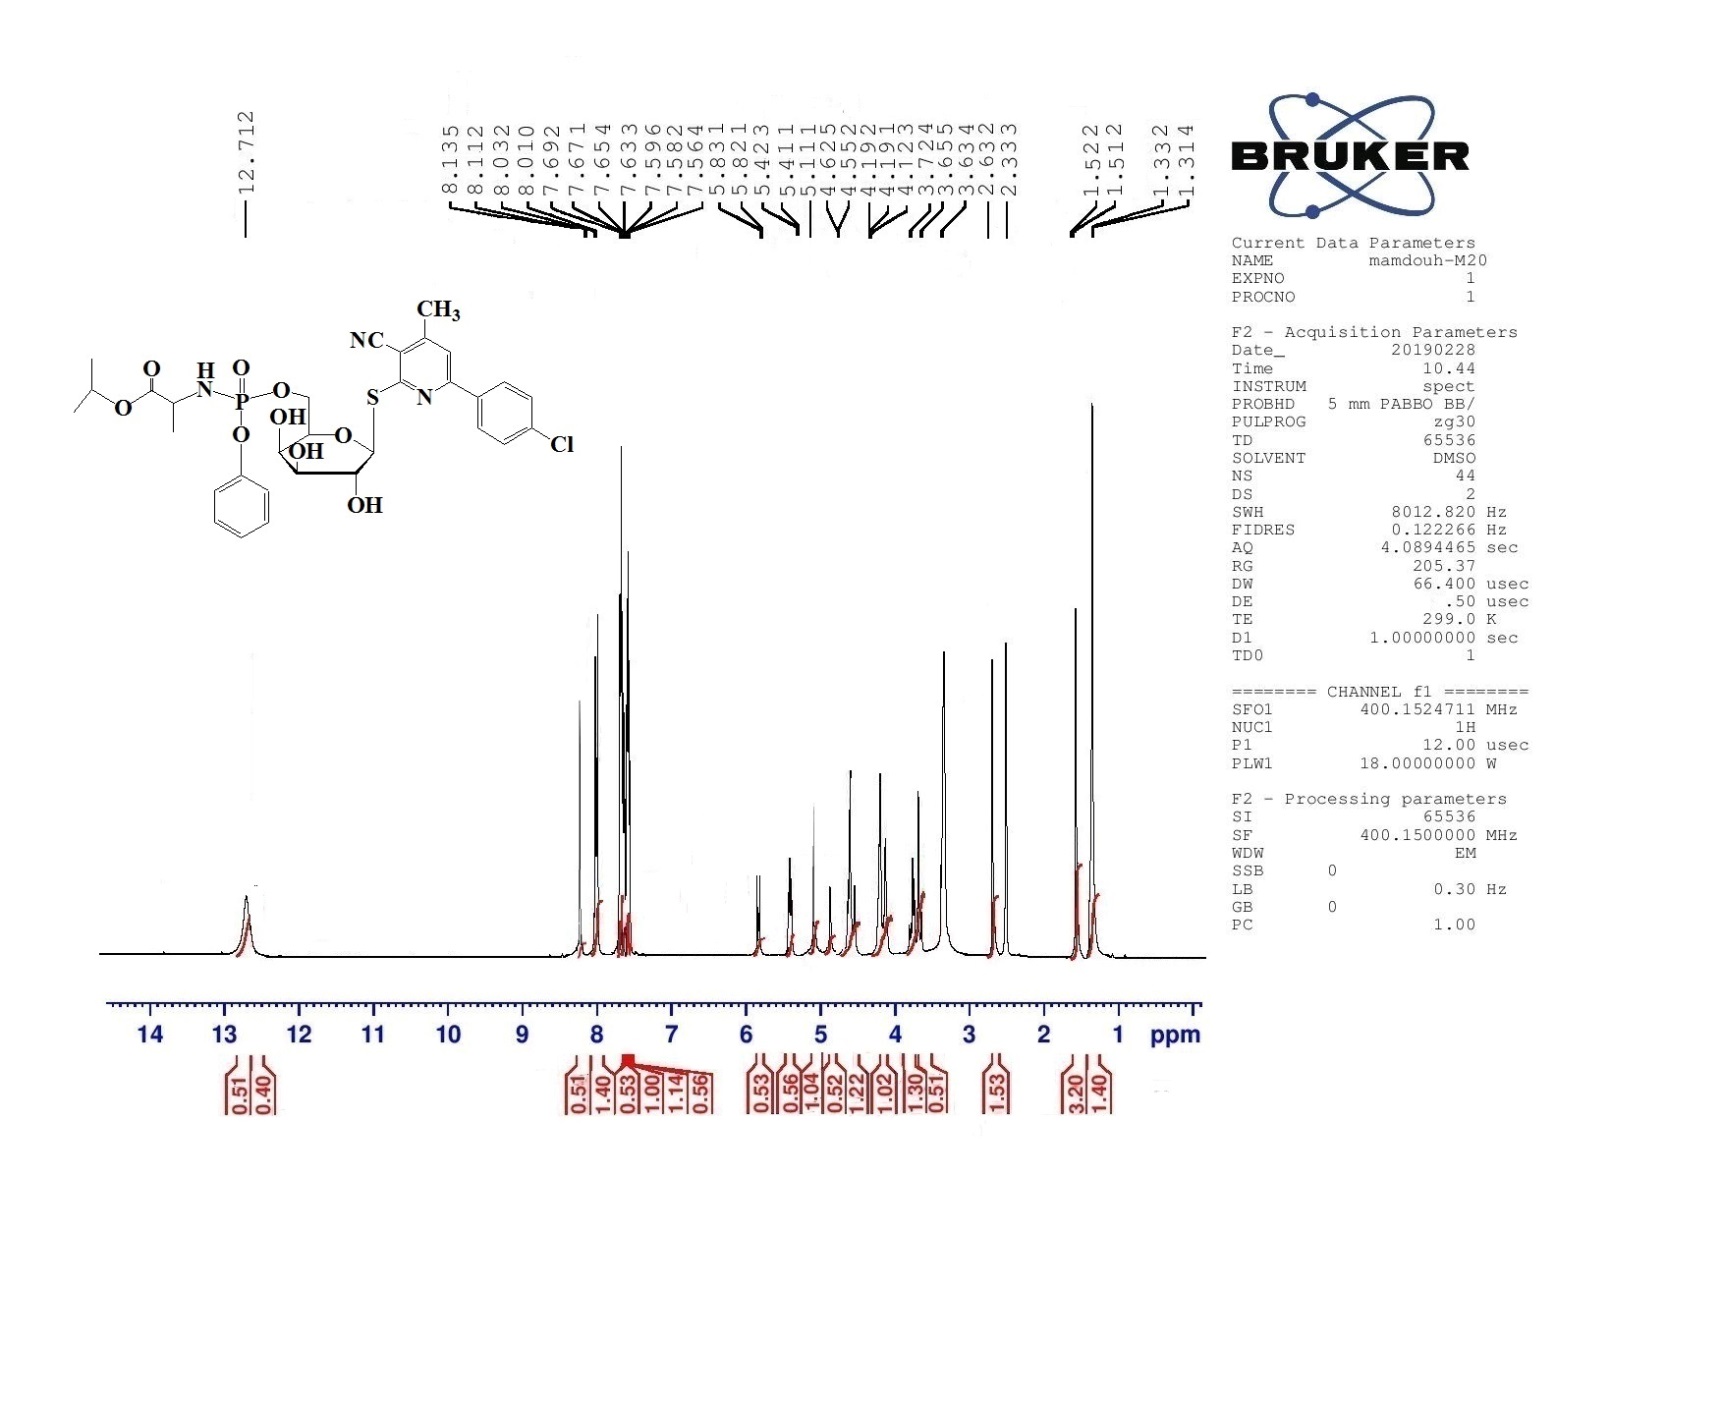
 Figure s10: 1H NMR of compound 6f

S11


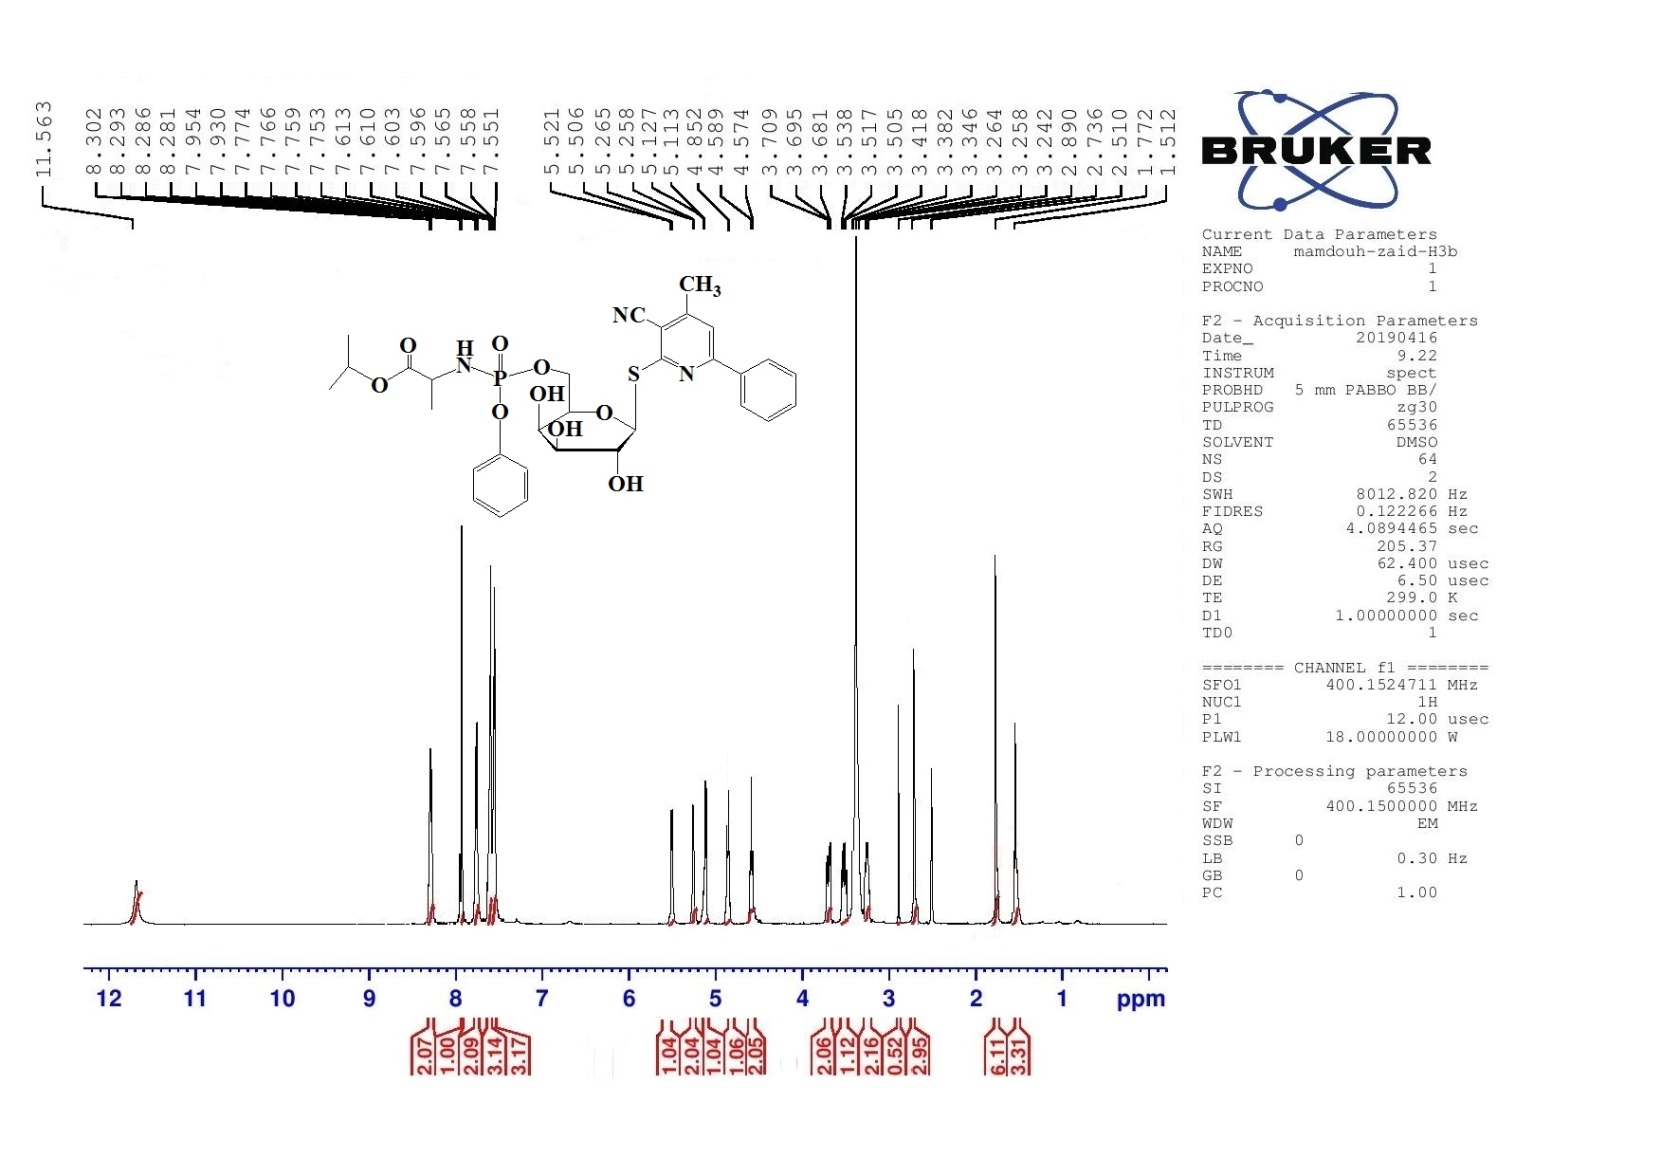
 Figure s11: 1H NMR of compound 6g

S12


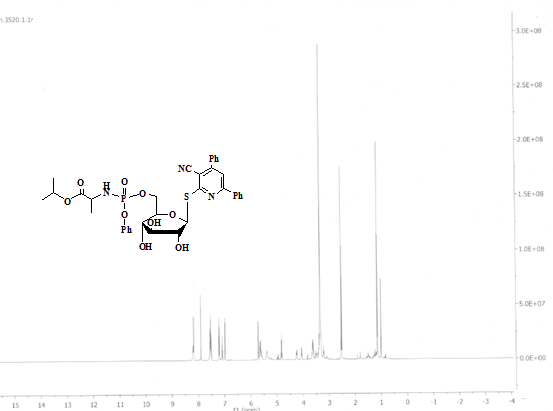


Figure s12: 1H NMR of compound 6h


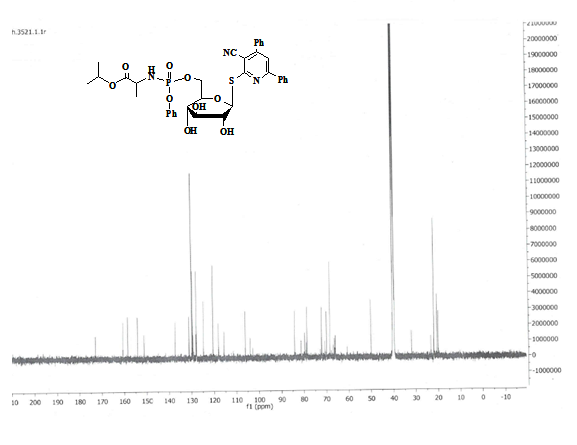
 Figure s13: 13C NMR of compound 6h

S14


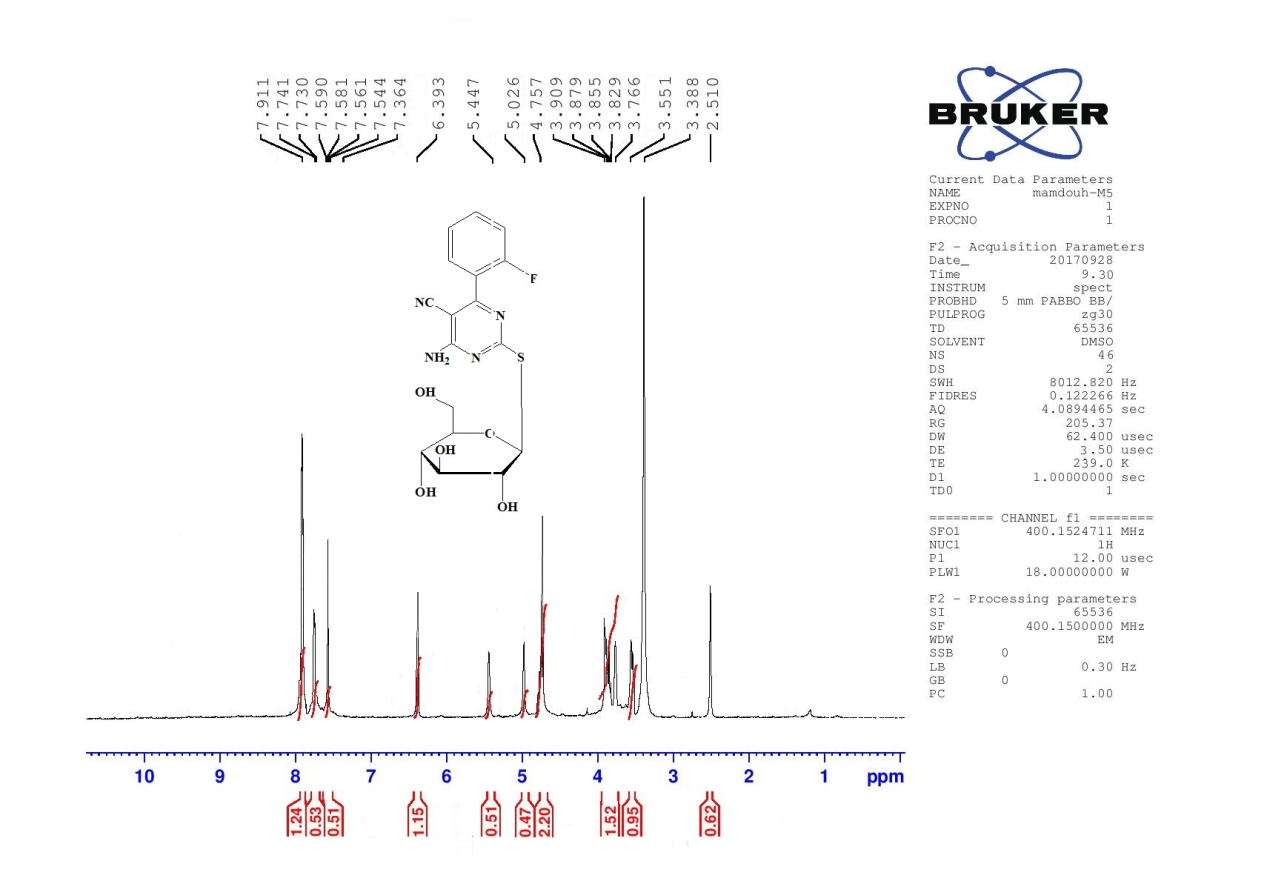


Figure s14: 1H NMR of compound 9a

S15


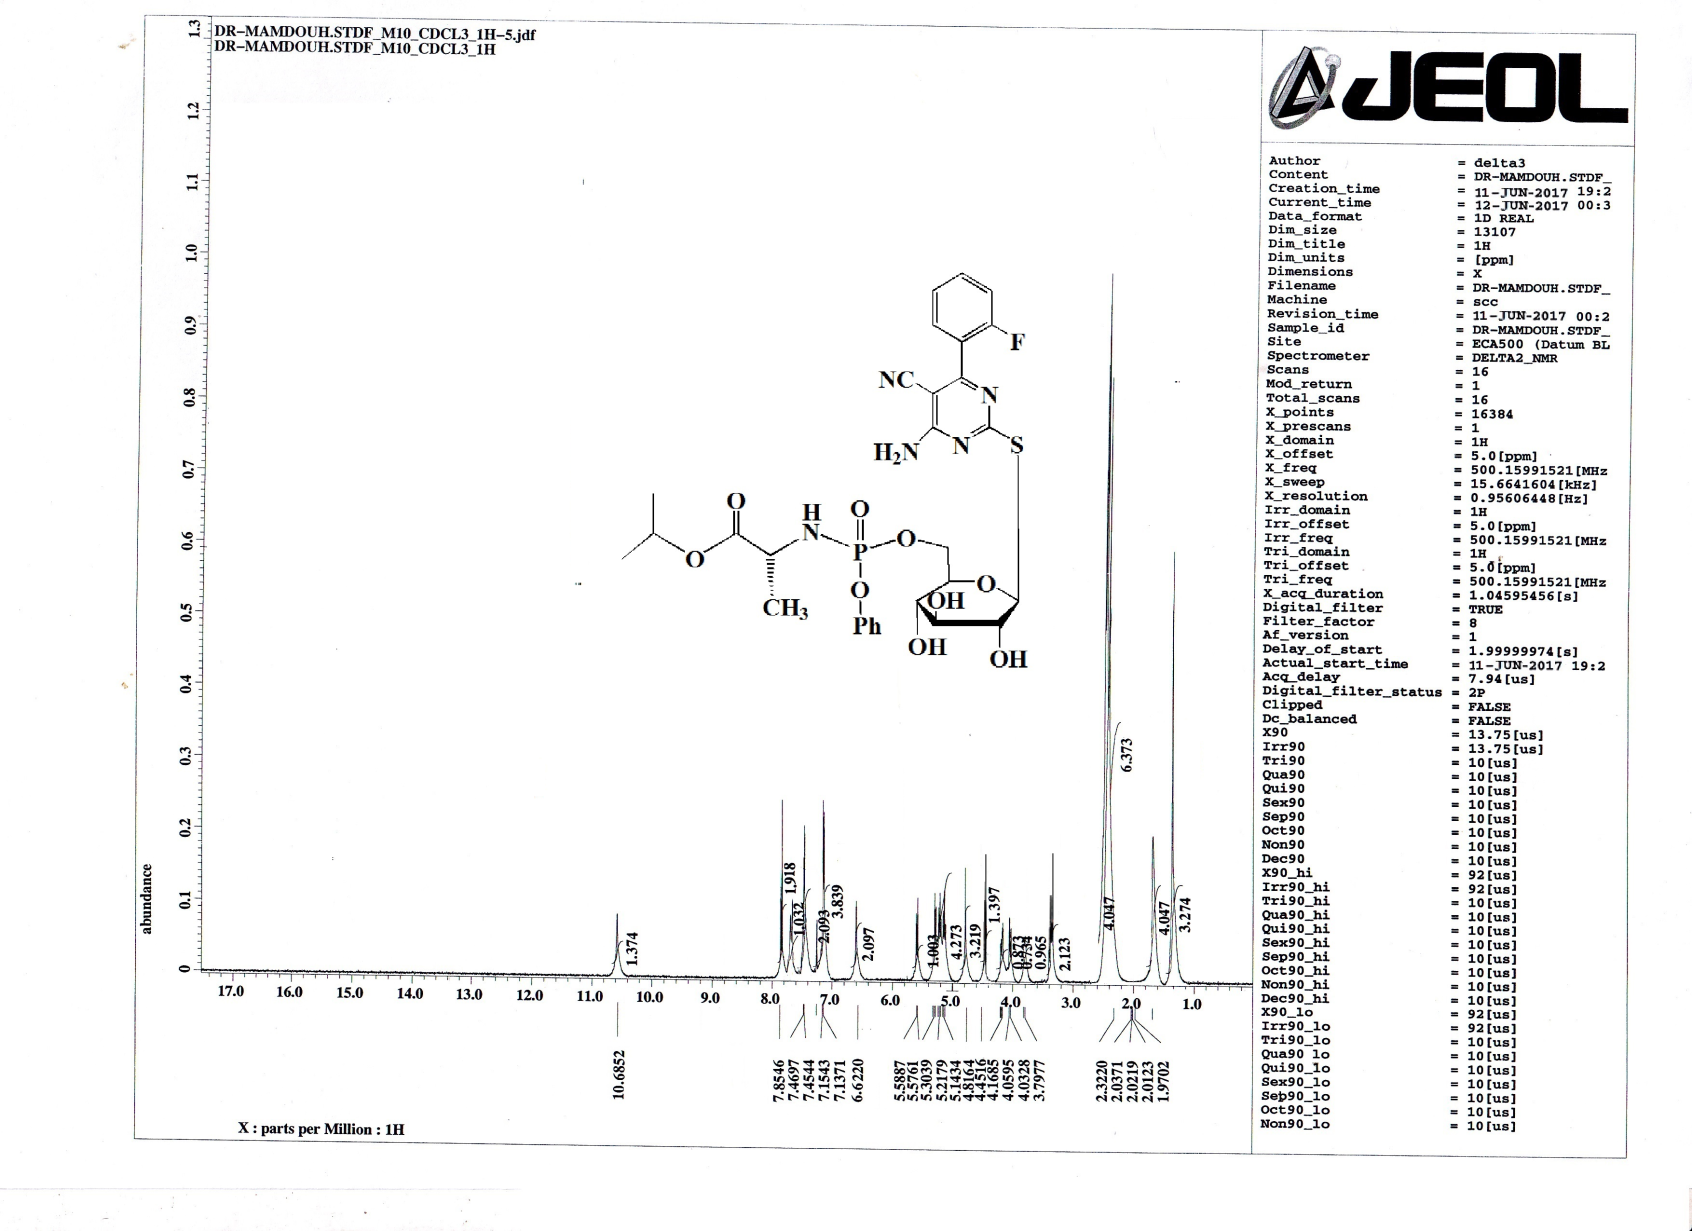


Figure s15: 1H NMR of compound 10a

S16


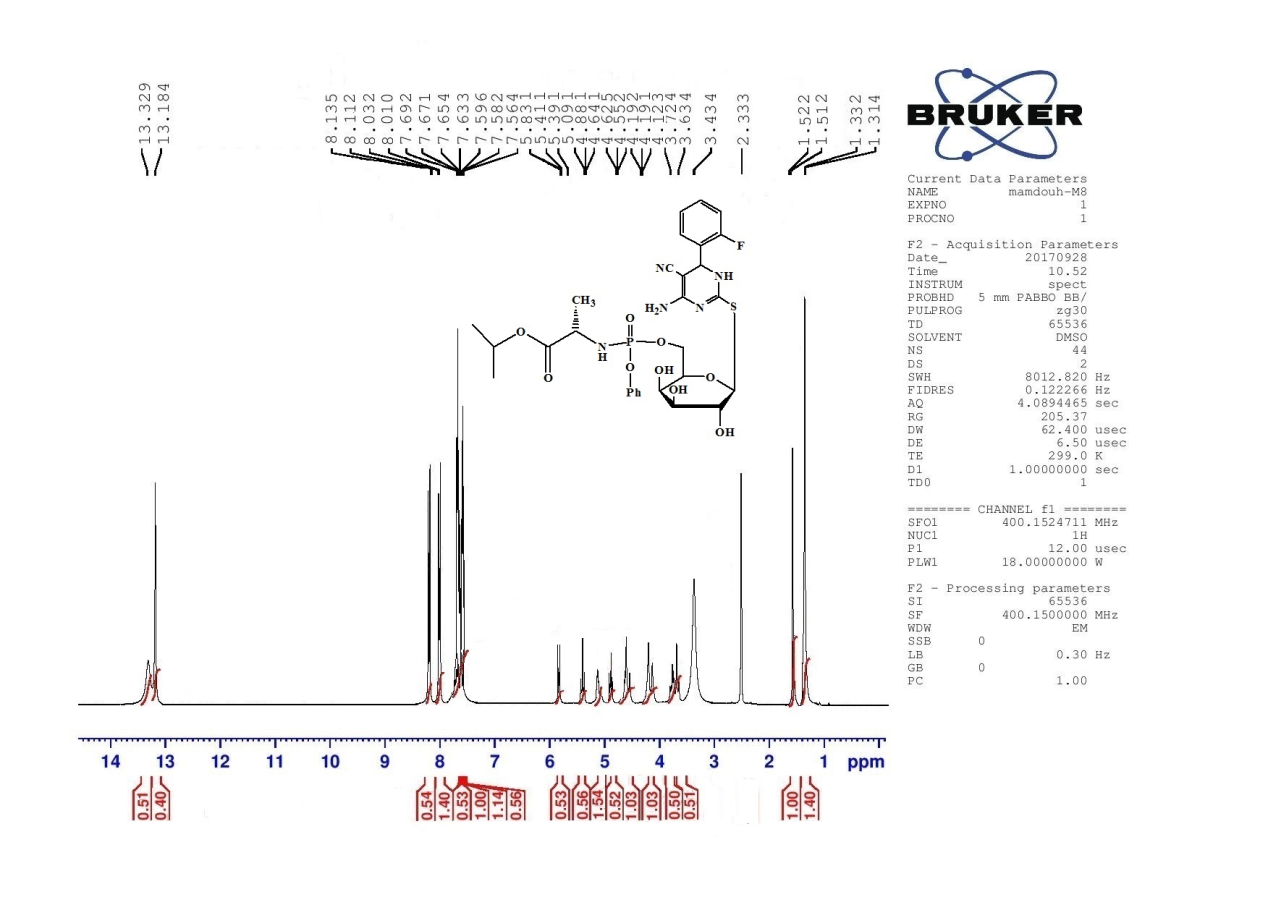


Figure s16: 1H NMR of compound 10b

S17


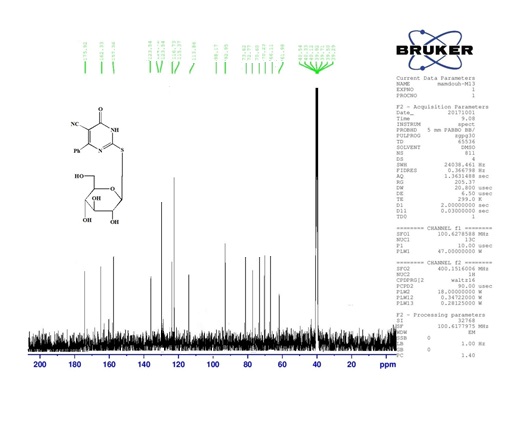


Figure s17: 13C NMR of compound 13a


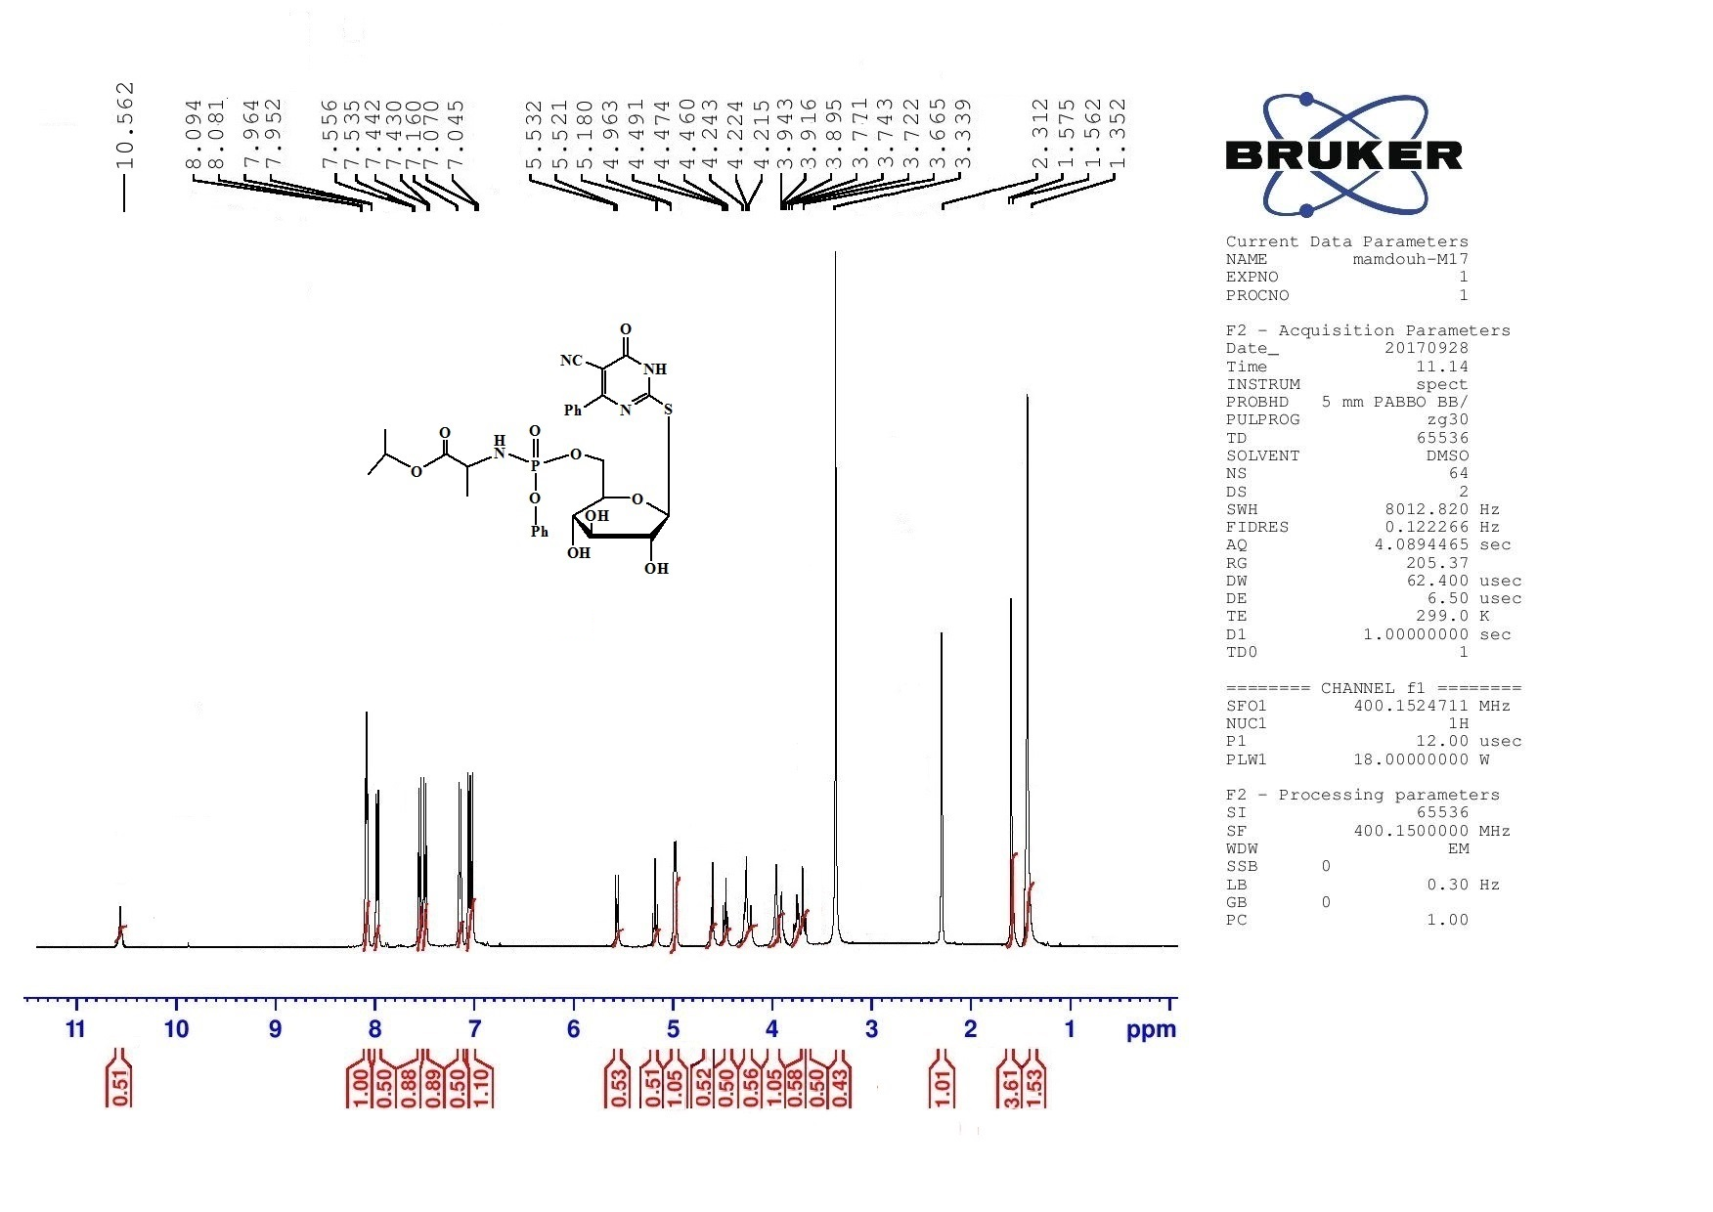
s18

figure s18: 1H NMR of compound 14a

S19


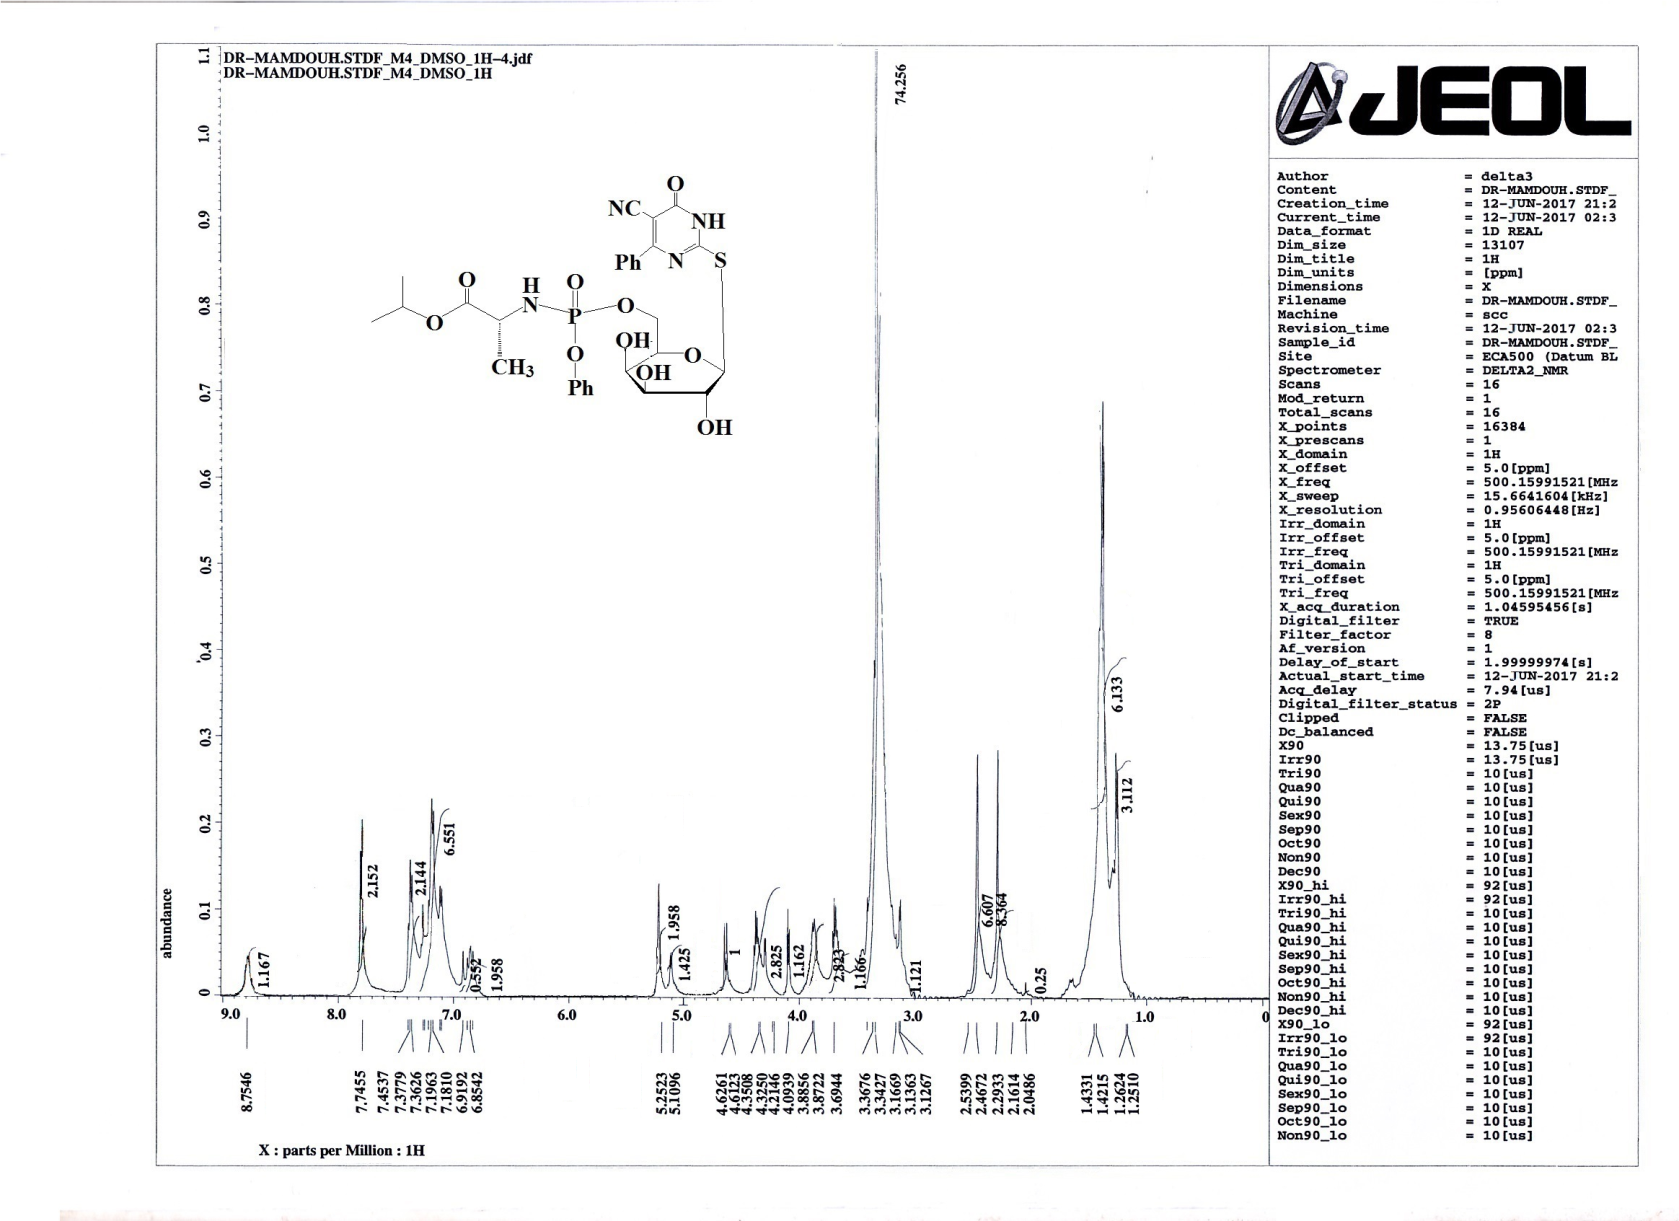


Figure s19: 1H NMR of compound 14b

S20


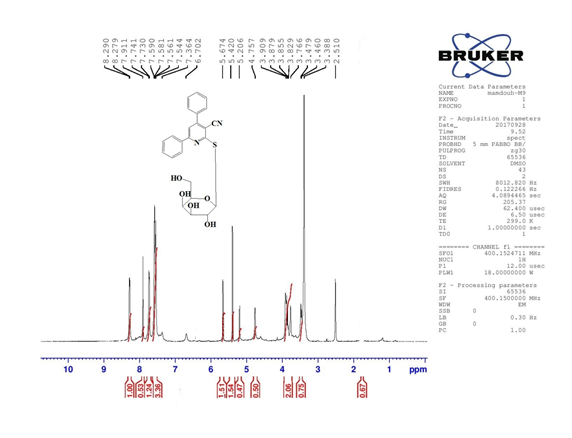


Figure s20: 1H NMR of compound 4i

S21


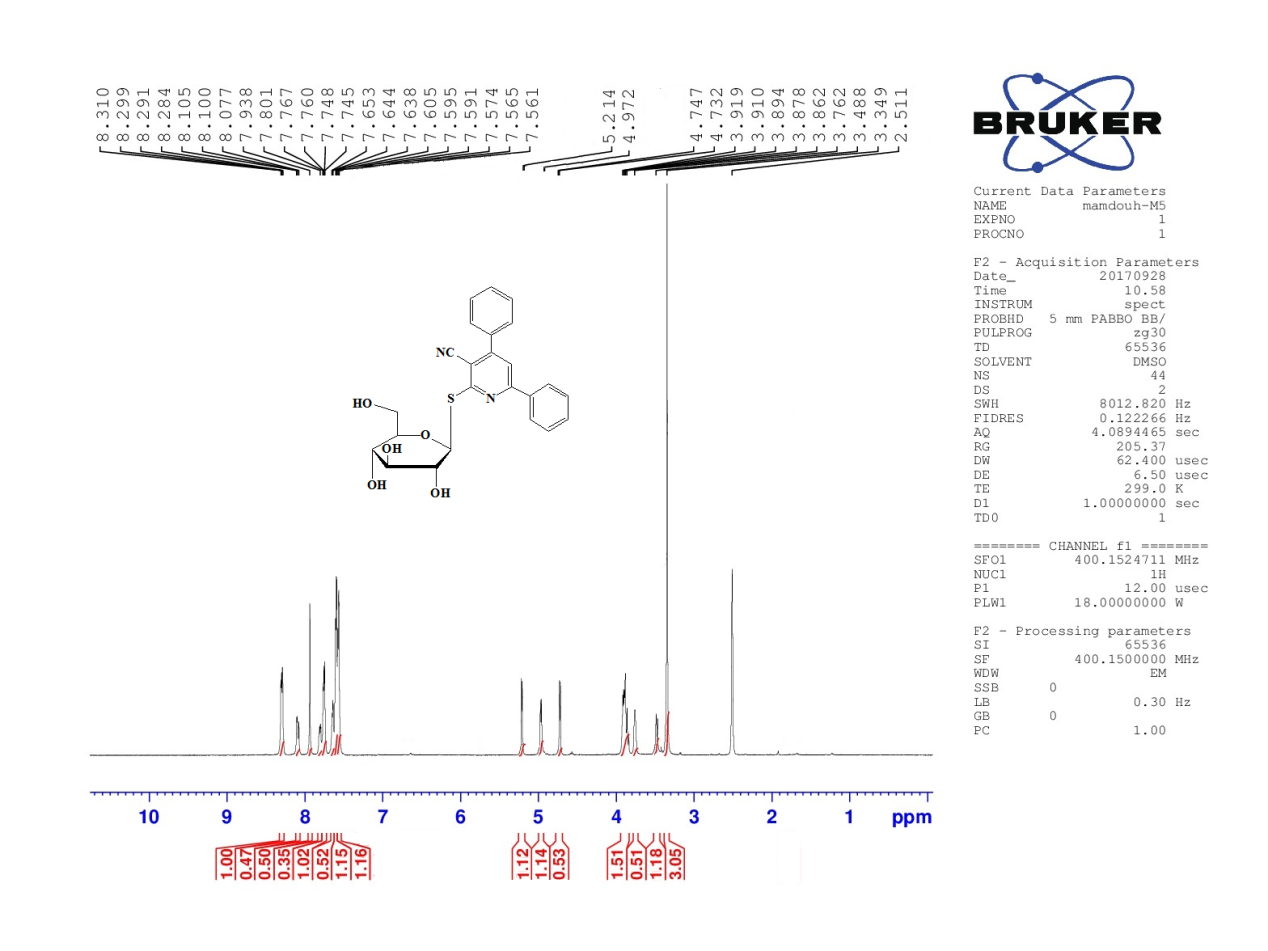


Figure s21: 1H NMR of compound 4h

S22


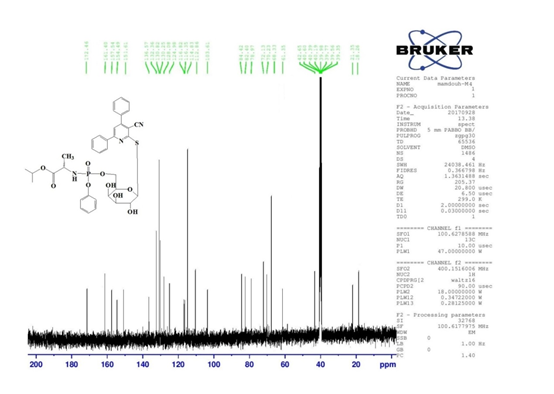


Figure s22: 13C NMR of compound 6i

S23

Inhibition %

Compd.No.

**Figure 1.** Cytotoxicity of compounds **4a**, **4b**, **4c**, **4d**, **4e, 4h a**nd **4i** at concentration0.25 and

0.125 µM.

S24

Inhibition %

Compd. No.

**Figure 2.** Cytotoxicity of compounds **6a**, **6b**, **6d**, **6e, 6f, 6g a**nd **6h** at concentration0.25

and 0.125 µM.

S25

.

Compd. No.

Inhibition %

**Figure 3.** Cytotoxicity of compounds **9a**, **9b**, **10a**, **10b, 14a a**nd **14b** at concentration

0.25 and 0.125 µM.

S26

Figure 4. Graphs of Inhibitory concentration 50 (IC50) of tested compounds (4a.4b, 4c, 4d, 4e, 4i, 6a, 6b, 6d, 6e, 6f, 6g, 9a, 9b, 10a, 10b, 14a and 14b): Antiviralactivity against Severe Acute Respiratory Syndrome Corona virus 2 (SARS-CoV-2) (hCoV19/Egypt/NRC-03/2020 (Accession Number on GSAID: EPI_ISL_430820.

S27

Figure 5. Graphs of Cytotoxicity concentration 50 (CC50) of tested compounds (4a.4b, 4c, 4d, 4e, 4i, 6a, 6b, 6d, 6e, 6f, 6g, 9a, 9b, 10a, 10b, 14a and 14b): on Vero E6 cells
